# Supplementary material for: Agglutinated foraminifera from the Turonian–Coniacian boundary interval in Europe – paleoenvironmental remarks and stratigraphy
Source: Copernicus journal article supplement (doi:10.5194/jm-42-117-2023), 2023-09-22
Supplement: Supplementary file 1 [file jm-42-117-2023-supplement.zip]

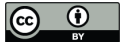

## *Supplement of*

# **Agglutinated foraminifera from the Turonian–Coniacian boundary interval in Europe – paleoenvironmental remarks and stratigraphy**

**Richard M. Besen et al.**

*Correspondence to:* Richard M. Besen ([rbesen@zedat.fu-berlin.de](mailto:rbesen@zedat.fu-berlin.de))

- [jm-42-117-2023-supplement-title-page.pdf](#)
- Supplements
  - [Table S1.xlsx](#)
  - [Table S2.xlsx](#)
  - [Table S3.xlsx](#)
  - [Table S4.xlsx](#)

The copyright of individual parts of the supplement might differ from the article licence.
